tracheal intubation than adults. Although the American Society of Anesthesiologists (Schaumburg, Illinois; ASA) provides definitions and clinical examples to guide the use of the ASA Physical Status system, Dr. Horvath states correctly that a patient's age is not considered.<sup>3</sup> Dr. Horvath's suggestion of updating the definitions for the ASA Physical Status system for pediatric patients is worthy of discussion. Assigning ASA Physical Status II to healthy infants because of higher rates of adverse events during tracheal intubation might be problematic. First, the purpose of the ASA Physical Status classification system is to communicate the patient's medical comorbidities, not their anesthetic risk. Second, if age were considered a comorbidity then one would have to assign a higher status for patients at both extremes of age, not just infants. Finally, a rapid sequence induction in a child increases the risk of hypoxemia during laryngoscopy, yet ASA Physical Status is not typically adjusted because of a plan for rapid sequence induction. There are many clinical scenarios wherein infants may be classified appropriately as ASA Physical Status I, such as a 3-month-old patient undergoing a circumcision. Although direct laryngoscopy can be challenging in infants, there are alternatives for establishing an airway, including supraglottic airways and video laryngoscopy, that may be less challenging than direct laryngoscopy.

In summary, we share Dr. Horvath's concerns about the need to document and communicate the higher incidence of adverse events in infants; however, we do not feel that ASA Physical Status is the right tool. We welcome further ideas to address this in the future.

### Competing Interests

Dr. Fiadjoe discloses funding from The Anesthesia Patient Safety Foundation (Rochester, Minnesota). The other authors declare no competing interests.

Jorge A. Gálvez, M.D., M.B.I., Samuel Acquah, M.D., Luis Ahumada, Ph.D., Lingyu Cai, M.S., Marcia Polanski, S.C.D., M.S., M.S.W., Lezhou Wu, Ph.D., Allan F. Simpao, M.D., M.B.I., Jonathan M. Tan, M.D., M.P.H., M.B.I., Jack Wasey, B.M., B.Ch., M.A., M.Sci., M.Sc., John E. Fiadjoe, M.D. The Children's Hospital of Philadelphia, and University of Pennsylvania Perelman School of Medicine, Philadelphia, Pennsylvania (J.A.G.). galvezj@email.chop.edu

DOI: 10.1097/ALN.0000000000000313

### References

1. Horvath B: Analysis of laryngoscopy attempts in infants: Comment. *ANESTHESIOLOGY* 2020; 133:237
2. Gálvez JA, Acquah S, Ahumada L, Cai L, Polanski M, Wu L, Simpao AE, Tan JM, Wasey J, Fiadjoe JE: Hypoxemia, bradycardia, and multiple laryngoscopy attempts during anesthetic induction in infants: A single-center, retrospective study. *ANESTHESIOLOGY* 2019; 131:830–9

3. Mayhew D, Mendonca V, Murthy BVS: A review of ASA physical status: Historical perspectives and modern developments. *Anaesthesia* 2019; 74:373–99

(Accepted for publication March 19, 2020. Published online first on April 14, 2020.)

## Priming Cardiopulmonary Bypass in Pediatric Surgery: Comment

### To the Editor:

We read with great interest the article of Dieu *et al.*<sup>1</sup> regarding cardiopulmonary bypass (CPB) priming strategy in pediatric cardiac surgery. In this double-blind randomized controlled study, the authors reported that priming with fresh frozen plasma or balanced crystalloids does not result in a different risk of postoperative bleeding and transfusion of allogeneic blood components. The authors clearly have to be congratulated for addressing a very relevant clinical question in a study with a high level of methodologic quality. However, several points need to be taken into account when interpreting the reported results.

First, the studied population is probably not at a high risk of postoperative bleeding requiring the transfusion of hemostatic agents such as fresh frozen plasma. Indeed, most patients enrolled in the trial were small children (above 1 yr of age) undergoing low- to moderate-risk surgery (Risk Adjustment for Congenital Heart Surgery score, 1 to 3), whereas neonates and infants with cyanotic disease have been shown to be especially at higher risk of significant postoperative blood loss.<sup>2</sup> The results of the present study do not help to define the best CPB priming strategy in these high-risk populations.

Second, the authors decided to treat all the blood remaining in the circuit after CPB weaning with a cell saver, eliminating platelets and coagulation factors in the autologous blood retransfused to the patients. The use of cell salvage has been recommended to reduce perioperative transfusion.<sup>3</sup> However, to our point of view, because one of the primary outcome of this study was postoperative bleeding, it would have been more rational to use ultrafiltration and/or modified ultrafiltration to reduce the positive fluid balance at the end of surgery, thus keeping coagulation factors in the autologous blood returned to the children. Also, the authors stated that the cell salvage blood at the end of the procedure

could be administered when necessary: could it be that this autologous blood was discarded in some patients?

Third, there is some evidence that adding albumin to CPB priming could be beneficial for the patient in terms of perioperative fluid balance and weight gain. As demonstrated in several randomized controlled studies, 6% hydroxyethyl starch 130/0.4 could be a cost-effective alternative to albumin for CPB priming in pediatric cardiac surgery.<sup>4-6</sup> Although we could agree that the evidence in favor of hydroxyethyl starch is not as high, there is also no clear evidence from the literature proving that a balanced crystalloid solution is effective and safe in this population.

Fourth, the authors advocated the double-blind design to justify the systematic transfusion of packed erythrocyte in the CPB prime. The author stated that the minimum desired hematocrit during CPB was 30% for patients with cyanotic heart disease and 25% for those with noncyanotic heart disease, which is not fully in line with actual transfusion guidelines in the field of pediatric patient blood management.<sup>3</sup> Could it be that some patients received allogeneic blood in the CPB, although they should have achieved the desired hematocrit without transfusion? Also, the transfusion triggers used in the postoperative period are much higher than those actually recommended.<sup>3,7</sup> To alleviate the problem regarding the maintenance of the double-blind design, the authors might have stratified the studied population according to the size of the CPB circuit, allowing study of a much broader population.

Because of these different elements, we think the study of Dieu *et al.*<sup>1</sup> addresses the problem only partially, and further works are required to help clinicians in defining the best strategy to manage CPB priming in pediatric cardiac surgery.

### Competing Interests

Dr. Van Der Linden received, within the past 5 yr, fees for lectures and consultancies from Fresenius Kabi GmbH (Bad Homburg, Germany), Aguetan Medical SA (Lyon, France), and Vifor Pharma (Antwerpen, Belgium). The other authors declare no competing interests.

Philippe Van Der Linden, M.D., Ph.D., Arielle Blanche, M.D., Denis Schartz, M.D. Centre Hospitalier Universitaire Brugmann and Hôpital Universitaire des Enfants Reine Fabiola, Brussels, Belgium (D.S.). denis.schartz@chu-brugmann.be

DOI: 10.1097/ALN.0000000000003351

### References

1. Dieu A, Rosal Martins M, Eeckhoudt S, Matta A, Kahn D, Khalifa C, Rubay J, Poncelet A, Haenecour A, Derycke E, Thiry D, Gregoire A, Momeni M: Fresh frozen plasma *versus* crystalloid priming of cardiopulmonary bypass circuit in pediatric surgery: A randomized clinical trial. *ANESTHESIOLOGY* 2020; 132:95–106
2. Faraoni D, Van der Linden P: Factors affecting postoperative blood loss in children undergoing cardiac surgery. *J Cardiothorac Surg* 2014; 9:32
3. Faraoni D, Meier J, New HV, Van der Linden PJ, Hunt BJ: Patient blood management for neonates and children undergoing cardiac surgery: 2019 NATA guidelines. *J Cardiothorac Vasc Anesth* 2019; 33:3249–63
4. Hanart C, Khalife M, De Villé A, Otte F, De Hert S, Van der Linden P: Perioperative volume replacement in children undergoing cardiac surgery: Albumin *versus* hydroxyethyl starch 130/0.4. *Crit Care Med* 2009; 37:696–701
5. Miao N, Yang J, Du Z, Liu W, Ni H, Xing J, Yang X, Xu B, Hou X: Comparison of low molecular weight hydroxyethyl starch and human albumin as priming solutions in children undergoing cardiac surgery. *Perfusion* 2014; 29:462–8
6. Van der Linden P, De Villé A, Hofer A, Heschl M, Gombotz H: Six percent hydroxyethyl starch 130/0.4 (Voluven®) *versus* 5% human serum albumin for volume replacement therapy during elective open-heart surgery in pediatric patients. *ANESTHESIOLOGY* 2013; 119:1296–309
7. Cholette JM, Willems A, Valentine SL, Bateman ST, Schwartz SM, Pediatric Critical Care Transfusion and Anemia Expertise Initiative (TAXI), Pediatric Critical Care Blood Research Network (BloodNet), and the Pediatric Acute Lung Injury and Sepsis Investigators (PALISI) Network: Recommendations on RBC transfusion in infants and children with acquired and congenital heart disease from the Pediatric Critical Care Transfusion and Anemia Expertise Initiative. *Pediatr Crit Care Med* 2018; 19:137–48

(Accepted for publication April 14, 2020. Published online first on May 12, 2020.)

## Priming Cardiopulmonary Bypass in Pediatric Surgery: Reply

### In Reply:

We thank Dr. Schartz *et al.*<sup>1</sup> for their interest in our randomized clinical trial comparing fresh frozen plasma *versus* crystalloid for priming cardiopulmonary

bypass (CPB) circuit in pediatric surgery.<sup>2</sup> The authors are right in noting that our studied population does not belong to the group of patients at the highest risk of postoperative bleeding, *i.e.* neonates and small infants. However, up to now, no single double-blind study has evaluated this issue in older infants and small children. From an ethical point of view this question needed to be analyzed in this population before conducting a similar study in a very high-risk population. As a matter of fact, the recent published guidelines on patient blood management in pediatrics undergoing cardiac surgery concluded that in infants and children, no recommendations can be made regarding the addition of fresh frozen plasma to the CPB because of the absence of evidence in the matter.<sup>3</sup>

Dr. Schmartz *et al.* ask why we did not use conventional and/or modified ultrafiltration that both help in preserving the coagulation factors in the autologous blood returned to the children. Ultrafiltration techniques are routinely performed in many centers performing congenital heart surgery. These techniques, especially modified ultrafiltration, have shown many advantages including reduced positive fluid balance and reduced transfusion of allogeneic blood products.<sup>4</sup> However, studies showing benefits from modified ultrafiltration are all greater than 10 yr old,<sup>4</sup> and it has been shown that modified ultrafiltration is no longer necessary when small circuit sizes and priming volumes are used.<sup>5</sup> In addition, modified ultrafiltration can result in significant complications.<sup>5</sup> We routinely use normothermic CPB with warm blood cardioplegia. We therefore do not apply modified ultrafiltration and use conventional ultrafiltration only sporadically. At this stage the administration of cell salvage is the best option in our population.

Dr. Schmartz *et al.* ask whether cell-salvage blood was discarded in some patients. This question refers to our statement that cell-salvage blood at the end of procedure could be administered when necessary. We of course did not discard this autologous blood, but the administration took place either in the operating theatre or in the intensive care unit whenever it was necessary.

Dr. Schmartz *et al.* point out that there is no clear evidence from the literature that the balanced crystalloid as used in our trial is as effective and as safe as balanced hydroxyethylstarch solutions. We have highlighted in our manuscript why we opted not to use hydroxyethylstarch solutions. A meta-analysis of randomized controlled trials in pediatrics has moreover shown that these solutions significantly decrease platelet count as compared with other fluids.<sup>6</sup> This may result in increased postoperative bleeding and would have adversely influenced our results. Moreover, comparing fresh frozen plasma to a solution that is not the standard of care in our hospital would not have been approved by our local ethical committee.

Dr. Schmartz *et al.* note that our perioperative transfusion trigger for red blood cells is higher than what is currently recommended.<sup>3</sup> These current guidelines are based

on two randomized studies.<sup>7,8</sup> Both studies were conducted with moderate to deep hypothermic CPB, and the randomization was aimed to obtain a hematocrit level of 20% versus 30%<sup>7</sup> or 25% versus 35%<sup>8</sup> at the onset of low-flow CPB. The question is whether the results of these studies can be extrapolated to our normothermic CPB management. Interestingly, the same group combined the data from these two trials to investigate the relationship between continuous hematocrit levels and postoperative outcomes.<sup>9</sup> They concluded that a hematocrit level at the onset of low-flow CPB of approximately 24% or higher is associated with higher Psychomotor Developmental Index scores and reduced lactate levels. Kussman *et al.*<sup>10</sup> analyzed the regional cerebral oximetry data of the trial that compared a hematocrit of 25% with a hematocrit of 35%.<sup>8</sup> They showed that perioperative periods of decreased cerebral oxygen delivery, as indicated by cerebral oximetry, are associated with lower Psychomotor Developmental Index scores and greater risk of hemosiderin on brain magnetic resonance imaging. We routinely use intraoperative regional cerebral oximetry and treat any cerebral oxygen desaturation based on established algorithms. We therefore have higher transfusion criteria.

Dr. Schmartz *et al.* assert that we should have included a broader population by stratifying the studied population according to the size of CPB circuit. As stated earlier, we aimed to investigate the CPB prime strategy in older infants before conducting the same study in neonates and younger infants. In conclusion, we agree that further well conducted studies are required in higher-risk patients. Meanwhile, our group has answered an important clinical question in a specific category of pediatric patients undergoing open heart surgery.

## Research Support

Supported by a research grant from the Belgian Society of Anesthesiology and Reanimation and the Department of Anesthesiology of Cliniques Universitaires Saint Luc, Brussels, Belgium.

## Competing Interests

The authors declare no competing interests.

Audrey Dieu, M.D., Mona Momeni, M.D., Ph.D. Cliniques Universitaires Saint Luc, Université Catholique de Louvain, Brussels, Belgium (M.M.). mona.momeni@uclouvain.be

DOI: 10.1097/ALN.0000000000003352

## References

1. Van Der Linden P, Blanjean A, Schmartz D: Priming cardiopulmonary bypass in pediatric surgery: Comment. *ANESTHESIOLOGY* 2020; 133:238–9

2. Dieu A, Rosal Martins M, Eeckhoudt S, Matta A, Kahn D, Khalifa C, Rubay J, Poncet A, Haenecour A, Derycke E, Thiry D, Gregoire A, Momeni M: Fresh frozen plasma *versus* crystalloid priming of cardiopulmonary bypass circuit in pediatric surgery: A randomized clinical trial. *ANESTHESIOLOGY* 2020; 132:95–106
3. Faraoni D, Meier J, New HV, Van der Linden PJ, Hunt BJ: Patient blood management for neonates and children undergoing cardiac surgery: 2019 NATA Guidelines. *J Cardiothorac Vasc Anesth* 2019; 33:3249–63
4. Bierer J, Stanzel R, Henderson M, Sett S, Horne D: Ultrafiltration in pediatric cardiac surgery review. *World J Pediatr Congenit Heart Surg* 2019; 10:778–88
5. Mejak BL, Lawson DS, Ing RJ: Modified ultrafiltration in pediatric cardiac surgery is no longer necessary. *J Cardiothorac Vasc Anesth* 2019; 33:870–2
6. Li L, Li Y, Xu X, Xu B, Ren R, Liu Y, Zhang J, He B: Safety evaluation on low-molecular-weight hydroxyethyl starch for volume expansion therapy in pediatric patients: A meta-analysis of randomized controlled trials. *Crit Care* 2015; 19:79
7. Jonas RA, Wypij D, Roth SJ, Bellinger DC, Visconti KJ, du Plessis AJ, Goodkin H, Laussen PC, Farrell DM, Bartlett J, McGrath E, Rappaport LJ, Bacha EA, Forbess JM, del Nido PJ, Mayer JE Jr, Newburger JW: The influence of hemodilution on outcome after hypothermic cardiopulmonary bypass: Results of a randomized trial in infants. *J Thorac Cardiovasc Surg* 2003; 126:1765–74
8. Newburger JW, Jonas RA, Soul J, Kussman BD, Bellinger DC, Laussen PC, Robertson R, Mayer JE Jr, del Nido PJ, Bacha EA, Forbess JM, Pigula F, Roth SJ, Visconti KJ, du Plessis AJ, Farrell DM, McGrath E, Rappaport LA, Wypij D: Randomized trial of hematocrit 25% *versus* 35% during hypothermic cardiopulmonary bypass in infant heart surgery. *J Thorac Cardiovasc Surg* 2008; 135:347–54
9. Wypij D, Jonas RA, Bellinger DC, Del Nido PJ, Mayer JE Jr, Bacha EA, Forbess JM, Pigula F, Laussen PC, Newburger JW: The effect of hematocrit during hypothermic cardiopulmonary bypass in infant heart surgery: Results from the combined Boston hematocrit trials. *J Thorac Cardiovasc Surg* 2008; 135:355–60
10. Kussman BD, Wypij D, Laussen PC, Soul JS, Bellinger DC, DiNardo JA, Robertson R, Pigula FA, Jonas RA, Newburger JW: Relationship of intraoperative cerebral oxygen saturation to neurodevelopmental outcome and brain magnetic resonance imaging at 1 year of age in infants undergoing biventricular repair. *Circulation* 2010; 122:245–54

(Accepted for publication April 14, 2020. Published online first on May 12, 2020.)

## Practice Guidelines for Central Venous Access: Comment

To the Editor:

We read with great interest the updated report by the American Society of Anesthesiologists Task Force on Central Venous Access about the practice guidelines for central venous access 2020.<sup>1</sup>

The relation between internal jugular vein and carotid artery at various head positions may deserve special attention. In a prospective observational study of 1,136 patients, 54% of the patients had internal jugular vein overlying the carotid artery (internal jugular vein overlying more than 75% of the carotid artery in an ultrasound image plane aligned in the direction of cannulating needle).<sup>2</sup> The vessel overlap would increase the incidence of accidental carotid puncture, which is the most common complication during cannulation of internal jugular vein (associated with 6.3% to 9.4% of procedures).<sup>3</sup>

Several studies have demonstrated the progressive increase in overlap between internal jugular vein and carotid artery with the incremental head rotation to opposite side.<sup>4–7</sup> While performing internal jugular vein cannulation, in addition to the Trendelenburg position and use of ultrasound, minimizing head rotation to the contralateral side may help to decrease the incidence of carotid artery puncture and enhance safety.<sup>8</sup>

### Competing Interests

The author declares no competing interests.

Gentle Sunder Shrestha, M.B.B.S., M.D., F.A.C.C., E.D.I.C., M.R.C.P.(I), F.C.C.P., F.N.C.S., Tribhuvan University Teaching Hospital, Maharajgunj, Kathmandu, Nepal. gentlesunder@hotmail.com

DOI: 10.1097/ALN.0000000000003350

### References

1. Apfelbaum JL, Rupp SM, Tung A, Connis RT, Domino KB, Grant MD, Mark JB: Practice guidelines for central venous access 2020: An updated report by the American Society of Anesthesiologists Task Force on Central Venous Access. *ANESTHESIOLOGY* 2020; 132:8–43
2. Troianos CA, Kuwik RJ, Pasqual JR, Lim AJ, Odasso DP: Internal jugular vein and carotid artery anatomic relation as determined by ultrasonography. *ANESTHESIOLOGY* 1996; 85:43–8
